# Supplementary material
Source: PubMed Central journal article supplement (PMC9899869)
Supplement: NIHMS1851720-supplement-Supplement_2__Quantitative_Measures.pdf [file NIHMS1851720-supplement-Supplement_2__Quantitative_Measures.pdf]

**Supplemental Material 1:**  
**QUANTITATIVE MEASURES**

## Sociodemographic Information Sheet

|                                 |                                                                                                                                                                                                          |
|---------------------------------|----------------------------------------------------------------------------------------------------------------------------------------------------------------------------------------------------------|
| 1. Age                          |                                                                                                                                                                                                          |
| 2. Ethnicity                    | 1 White<br>2 Black/African American<br>3 Hispanic<br>4 Asian<br>5 Mixed<br>6 Other (please specify)<br>_____                                                                                             |
| 3. Education (Highest received) | 1 less than high school (less than 12 years)<br>2 high school or greater (more than 12 years or GED)<br>3 some college<br>4 Bachelor's degree<br>5 graduate degree<br>(specify if graduate degree) _____ |
| 2 Children                      | 1 yes<br>If yes, how many? _____<br><br>2 no                                                                                                                                                             |
| 3 Religion                      | 1 Catholic<br>2 Protestant<br>3 Jewish<br>4 Muslim<br>5 Buddhist<br>6 Other (please specify)<br>_____                                                                                                    |
| 4 Marital Status                | 1 Single<br>2 Married<br>3 Divorced<br>4 Separated<br>5 Widowed                                                                                                                                          |

|                                                                                                                       |                                                                                                                                                                                                                                                                                |
|-----------------------------------------------------------------------------------------------------------------------|--------------------------------------------------------------------------------------------------------------------------------------------------------------------------------------------------------------------------------------------------------------------------------|
| 5 What do you consider your sexual orientation to be?                                                                 | <ol style="list-style-type: none"><li>1 Straight</li><li>2 Lesbian</li><li>3 Bisexual</li><li>4 Something else</li><li>5 Don't know</li></ol>                                                                                                                                  |
| 6 Have you been diagnosed with the following from a doctor or other health care professional? (Circle all that apply) | <ol style="list-style-type: none"><li>1 Depression</li><li>2 Anxiety</li><li>3 Posttraumatic Stress Disorder (PTSD)</li><li>4 Bipolar disorder</li><li>5 ADD/ADHD</li><li>6 Schizophrenia</li><li>7 Borderline personality disorder</li><li>8 Other (write in) _____</li></ol> |
